# Supplementary material for: New Insights into the Neuromyogenic Spectrum of a Gain of Function Mutation in SPTLC1
Source: MDPI journal article supplement (doi:10.3390/genes13050893), 2022-05-17
Supplement: s1 [file s1]

Supplementals:

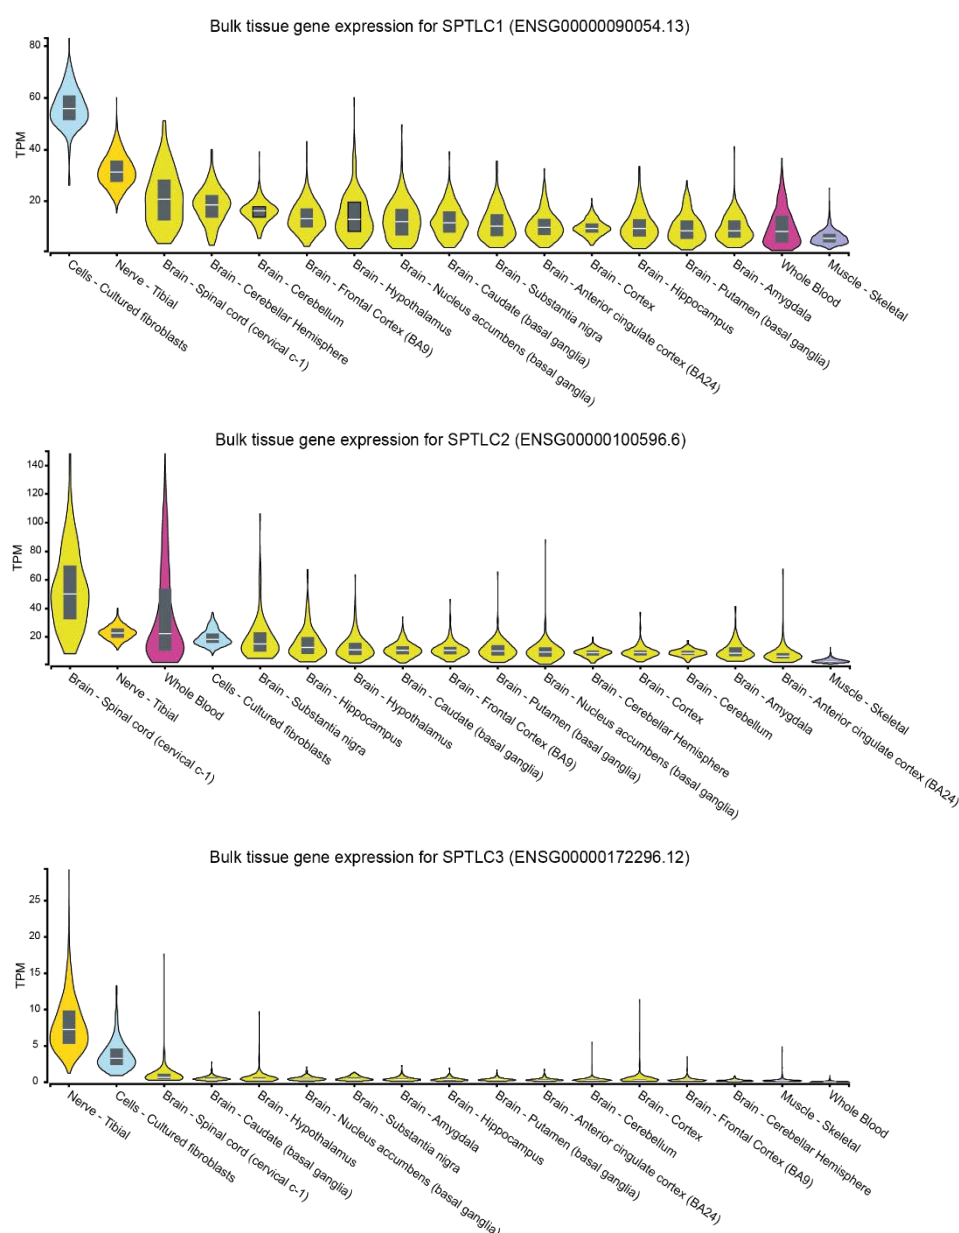

**Figure S1: GTEx-based in silico analysis of tissue expression of *SPTLC1* (upper panel), *SPTLC2*, (middle panel) and *SPTLC3* (lower panel).** Expressed are log<sub>10</sub>-ratios of transcripts per million (TPM) in the respective tissues/nervous areas as violin plots. Order (from left to right) accords with expression level (from high to low).

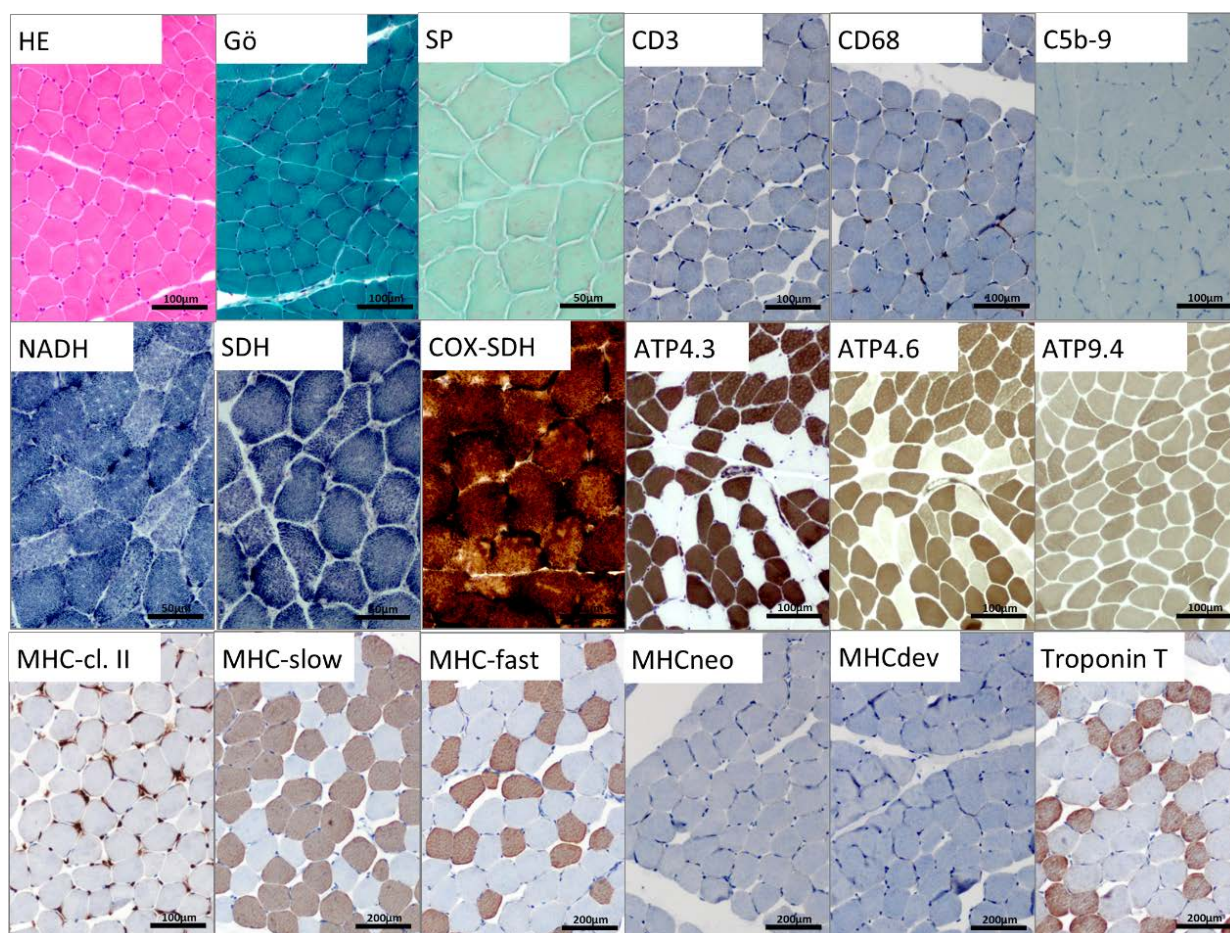

**Figure S2:** Staining of juvenile non-disease controls

## SPTLC1 patient

2842  $\text{cm}^{-1}$  (lipid)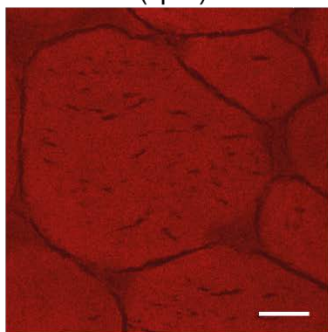2886  $\text{cm}^{-1}$  (lipid)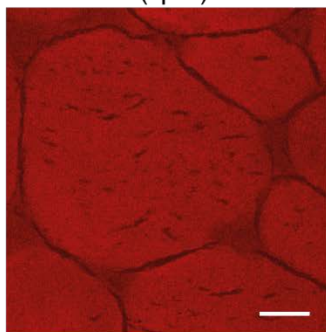2932  $\text{cm}^{-1}$  (protein)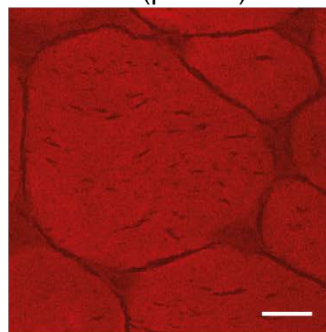

**Figure S3.** CARS images of the p.(A20S)-SPTLC1 patient-derived quadriceps muscle. No significant features could be detected at the wavenumbers 2842  $\text{cm}^{-1}$  (lipid), 2886  $\text{cm}^{-1}$  (lipid) and 2932  $\text{cm}^{-1}$  (protein). (Scale bar: 15  $\mu\text{m}$ ).

Table S1

| Accessions | Genes    | Protein Descriptions                                          | Unique Peptides | Fold Change | p Value |
|------------|----------|---------------------------------------------------------------|-----------------|-------------|---------|
| Q05397     | PTK2     | Focal adhesion kinase 1                                       | 3               | 13.10       | 0.034   |
| P01876     | IGHA1    | Immunoglobulin heavy constant alpha 1                         | 9               | 6.36        | 0.000   |
| P01834     | IGKC     | Immunoglobulin kappa constant                                 | 5               | 3.90        | 0.000   |
| P51452     | DUSP3    | Dual specificity protein phosphatase 3                        | 2               | 2.86        | 0.006   |
| Q03169     | TNFAIP2  | Tumor necrosis factor alpha-induced protein 2                 | 4               | 2.82        | 0.020   |
| P09417     | QDPR     | Dihydropteridine reductase                                    | 4               | 2.69        | 0.000   |
| P22090     | RPS4Y1   | 40S ribosomal protein S4, Y isoform 1                         | 2               | 2.64        | 0.008   |
| P30443     | HLA-A    | HLA class I histocompatibility antigen, A-1 alpha chain       | 7               | 2.61        | 0.002   |
| P14151     | SELL     | L-selectin                                                    | 3               | 2.26        | 0.007   |
| O95816     | BAG2     | BAG family molecular chaperone regulator 2                    | 2               | 2.02        | 0.001   |
| P09913     | IFIT2    | Interferon-induced protein with tetratricopeptide repeats 2   | 2               | 1.99        | 0.005   |
| Q96HC4     | PDLIM5   | PDZ and LIM domain protein 5                                  | 5               | 1.97        | 0.000   |
| P28161     | GSTM2    | Glutathione S-transferase Mu 2                                | 3               | 1.96        | 0.015   |
| Q8N1S5     | SLC39A11 | Zinc transporter ZIP11                                        | 2               | 0.54        | 0.033   |
| Q9HA77     | CARS2    | Probable cysteine--tRNA ligase, mitochondrial                 | 9               | 0.54        | 0.000   |
| Q9NVH6     | TMLHE    | Trimethyllysine dioxygenase, mitochondrial                    | 2               | 0.54        | 0.004   |
| Q9Y3L3     | SH3BP1   | SH3 domain-binding protein 1                                  | 9               | 0.53        | 0.034   |
| P46934     | NEDD4    | E3 ubiquitin-protein ligase NEDD4                             | 3               | 0.53        | 0.010   |
| Q9UH65     | SWAP70   | Switch-associated protein 70                                  | 10              | 0.53        | 0.008   |
| Q13423     | NNT      | NAD(P) transhydrogenase, mitochondrial                        | 30              | 0.52        | 0.000   |
| P16435     | POR      | NADPH--cytochrome P450 reductase                              | 16              | 0.52        | 0.023   |
| Q9ULJ6     | ZMIZ1    | Zinc finger MIZ domain-containing protein 1                   | 2               | 0.51        | 0.019   |
| Q14247     | CTTN     | Src substrate cortactin                                       | 6               | 0.51        | 0.047   |
| Q6P179     | ERAP2    | Endoplasmic reticulum aminopeptidase 2                        | 9               | 0.51        | 0.001   |
| A8MXV4     | NUDT19   | Nucleoside diphosphate-linked moiety X motif 19               | 6               | 0.51        | 0.003   |
| Q92643     | PIGK     | GPI-anchor transamidase                                       | 2               | 0.50        | 0.016   |
| P82912     | MRPS11   | 28S ribosomal protein S11, mitochondrial                      | 3               | 0.50        | 0.008   |
| P50416     | CPT1A    | Carnitine O-palmitoyltransferase 1, liver isoform             | 9               | 0.50        | 0.008   |
| Q96S52     | PIGS     | GPI transamidase component PIG-S                              | 5               | 0.49        | 0.002   |
| P04792     | HSPB1    | Heat shock protein beta-1                                     | 13              | 0.49        | 0.052   |
| P85037     | FOXK1    | Forkhead box protein K1                                       | 3               | 0.48        | 0.044   |
| O15269     | SPTLC1   | Serine palmitoyltransferase 1                                 | 6               | 0.48        | 0.000   |
| P21964     | COMT     | Catechol O-methyltransferase                                  | 3               | 0.46        | 0.032   |
| Q92522     | H1FX     | Histone H1x                                                   | 6               | 0.46        | 0.016   |
| Q7Z4H8     | KDEL2    | KDEL motif-containing protein 2                               | 2               | 0.46        | 0.025   |
| P30837     | ALDH1B1  | Aldehyde dehydrogenase X, mitochondrial                       | 7               | 0.46        | 0.002   |
| Q9H7L9     | SUDS3    | Sin3 histone deacetylase corepressor complex component SDS3   | 2               | 0.45        | 0.023   |
| P62072     | TIMM10   | Mitochondrial import inner membrane translocase subunit Tim10 | 2               | 0.44        | 0.038   |

|         |             |                                                                   |    |      |       |
|---------|-------------|-------------------------------------------------------------------|----|------|-------|
| P52429  | DGKE        | Diacylglycerol kinase epsilon                                     | 2  | 0.42 | 0.001 |
| Q16643  | DBN1        | Drebrin                                                           | 9  | 0.42 | 0.000 |
| Q8IYQ7  | THNSL1      | Threonine synthase-like 1                                         | 2  | 0.41 | 0.002 |
| P48595  | SERPINB10   | Serpin B10                                                        | 8  | 0.41 | 0.005 |
| Q8NFBV4 | ABHD11      | Protein ABHD11                                                    | 3  | 0.41 | 0.017 |
| Q14571  | ITPR2       | Inositol 1,4,5-trisphosphate receptor type 2                      | 9  | 0.41 | 0.019 |
| P01871  | IGHM        | Immunoglobulin heavy constant mu                                  | 17 | 0.40 | 0.001 |
| P08397  | HMBS        | Porphobilinogen deaminase                                         | 3  | 0.37 | 0.025 |
| P26447  | S100A4      | Protein S100-A4                                                   | 3  | 0.33 | 0.000 |
| P34913  | EPHX2       | Bifunctional epoxide hydrolase 2                                  | 3  | 0.32 | 0.038 |
| Q92597  | NDRG1       | Protein NDRG1                                                     | 2  | 0.31 | 0.004 |
| Q08623  | PUDP        | Pseudouridine-5'-phosphatase                                      | 2  | 0.29 | 0.003 |
| Q15771  | RAB30       | Ras-related protein Rab-30                                        | 2  | 0.27 | 0.027 |
| P80723  | BASP1       | Brain acid soluble protein 1                                      | 10 | 0.25 | 0.001 |
| Q8TCB0  | IFI44       | Interferon-induced protein 44                                     | 2  | 0.23 | 0.001 |
| Q6DN90  | IQSEC1      | IQ motif and SEC7 domain-containing protein 1                     | 3  | 0.23 | 0.000 |
| B9A064  | IGLL5       | Immunoglobulin lambda-like polypeptide 5                          | 2  | 0.22 | 0.000 |
| Q7L3T8  | PARS2       | Probable proline--tRNA ligase, mitochondrial                      | 2  | 0.19 | 0.010 |
| P80748  | IGLV3-21    | Immunoglobulin lambda variable 3--21                              | 2  | 0.11 | 0.000 |
| P04083  | ANXA1       | Annexin A1                                                        | 10 | 0.10 | 0.000 |
| P0DOY2  | IGLC2;IGLC3 | Immunoglobulin lambda constant 2;Immunoglobulin lambda constant 3 | 4  | 0.07 | 0.000 |
